# Supplementary material for: Exposure to Amoxicillin in Early Life Is Associated With Changes in Gut Microbiota and Reduction in Blood Pressure: Findings From a Study on Rat Dams and Offspring
Source: PubMed Central journal article supplement — J Am Heart Assoc. 2020 Jan 11;9(2):e014373. doi: 10.1161/JAHA.119.014373 (PMC7033837; doi:10.1161/jaha.119.014373), 2020-01-11

# **SUPPLEMENTAL MATERIAL**

**Figure S1. Cladogram generated from amoxicillin vs control treated rats microbiota at time point 1. (Expanded view of Figure 2c).**

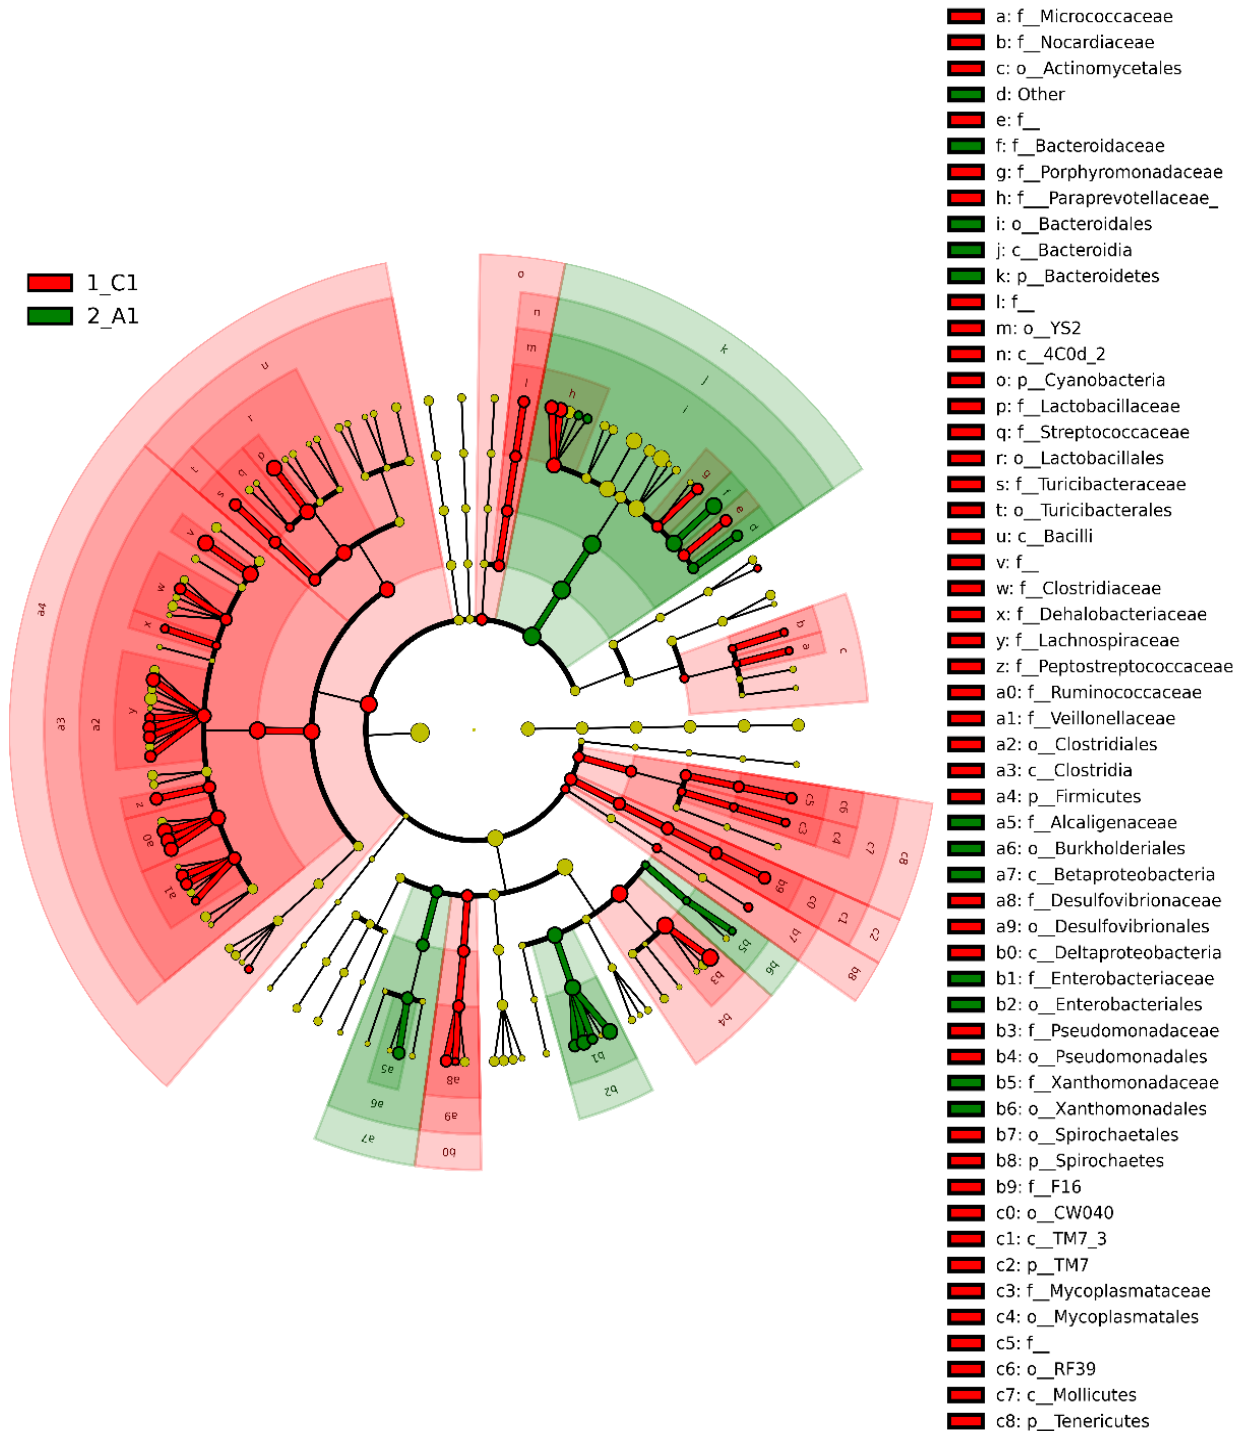

**Figure S2. Cladogram generated from amoxicillin vs control treated rat's microbiota at time point 2. (Expanded view of Figure 2d).**

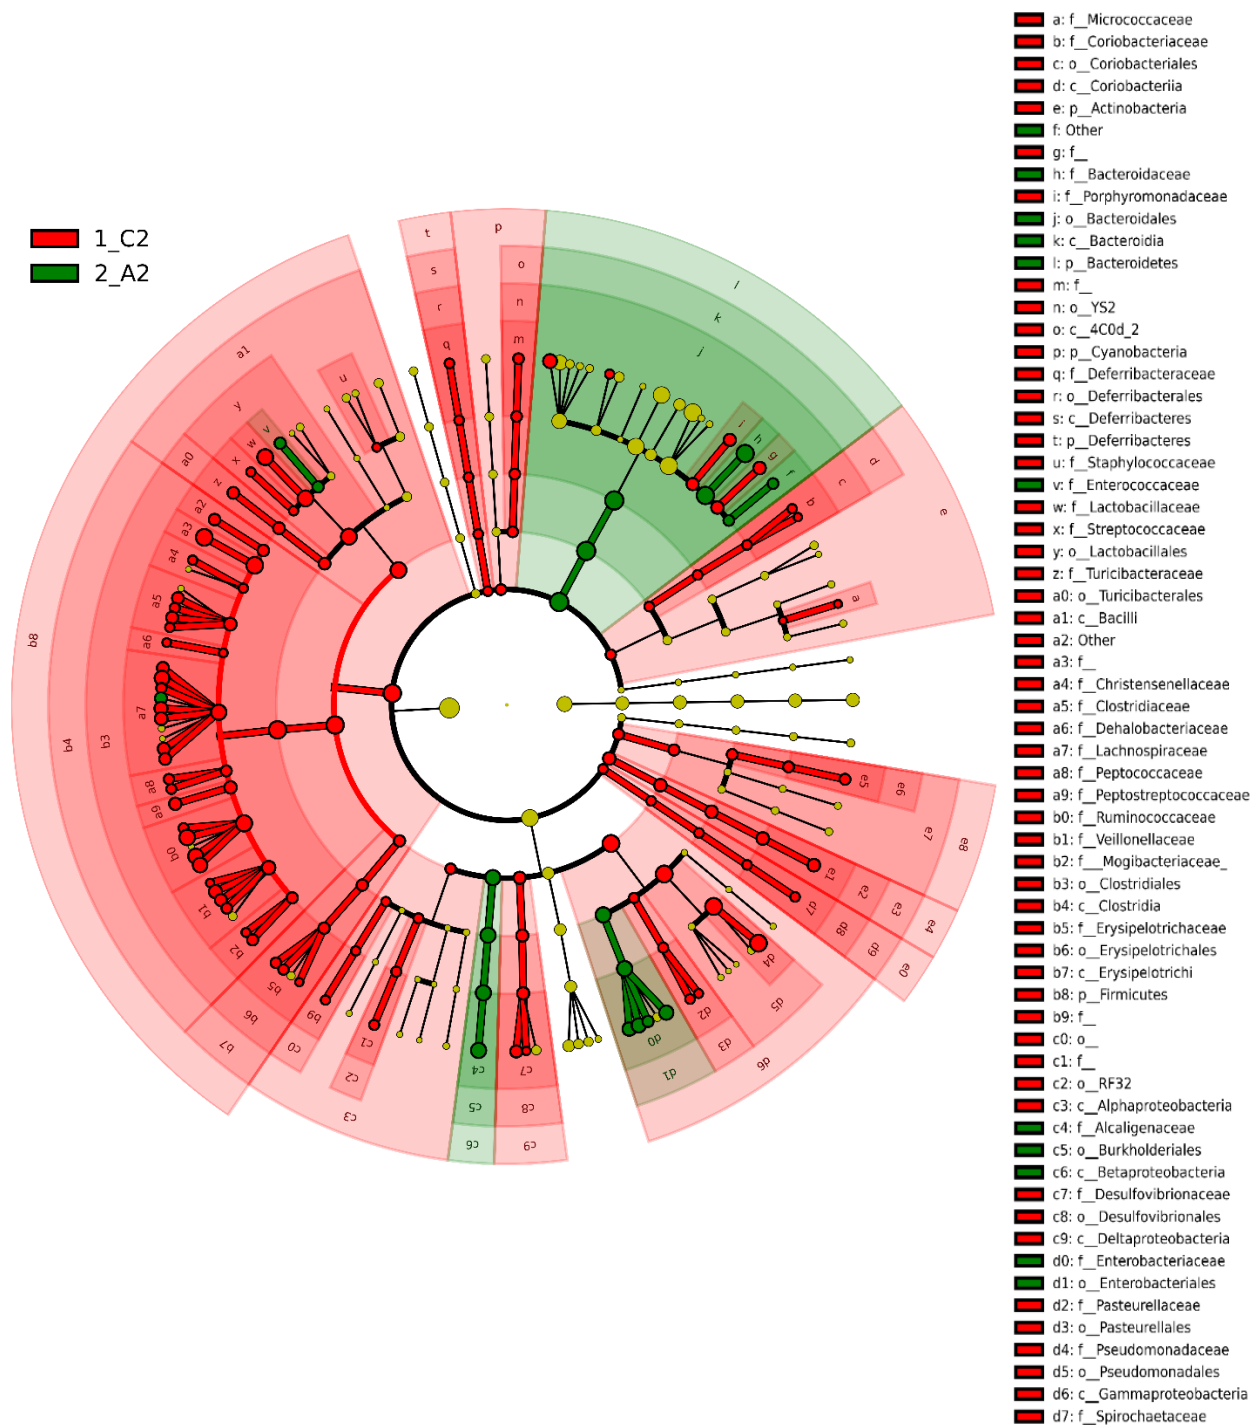

**Figure S3. Cladogram generated from amoxicillin vs control treated rat's microbiota at time point 3. (Expanded view of Figure 2e).**

1\_C3  
2\_A3

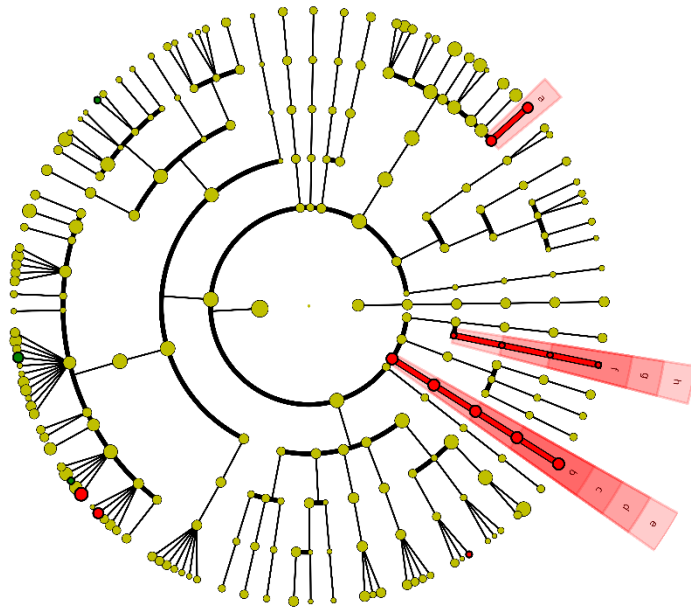

a: f\_  
b: f\_F16  
c: o\_CW040  
d: c\_TM7\_3  
e: p\_TM7  
f: f\_Cerasicoccaceae\_  
g: o\_Cerasicoccales\_  
h: c\_Opitutae

**Figure S4. Cladogram generated from the microbiota of offspring of amoxicillin vs control treated dams. (Expanded view of Figure 7c).**

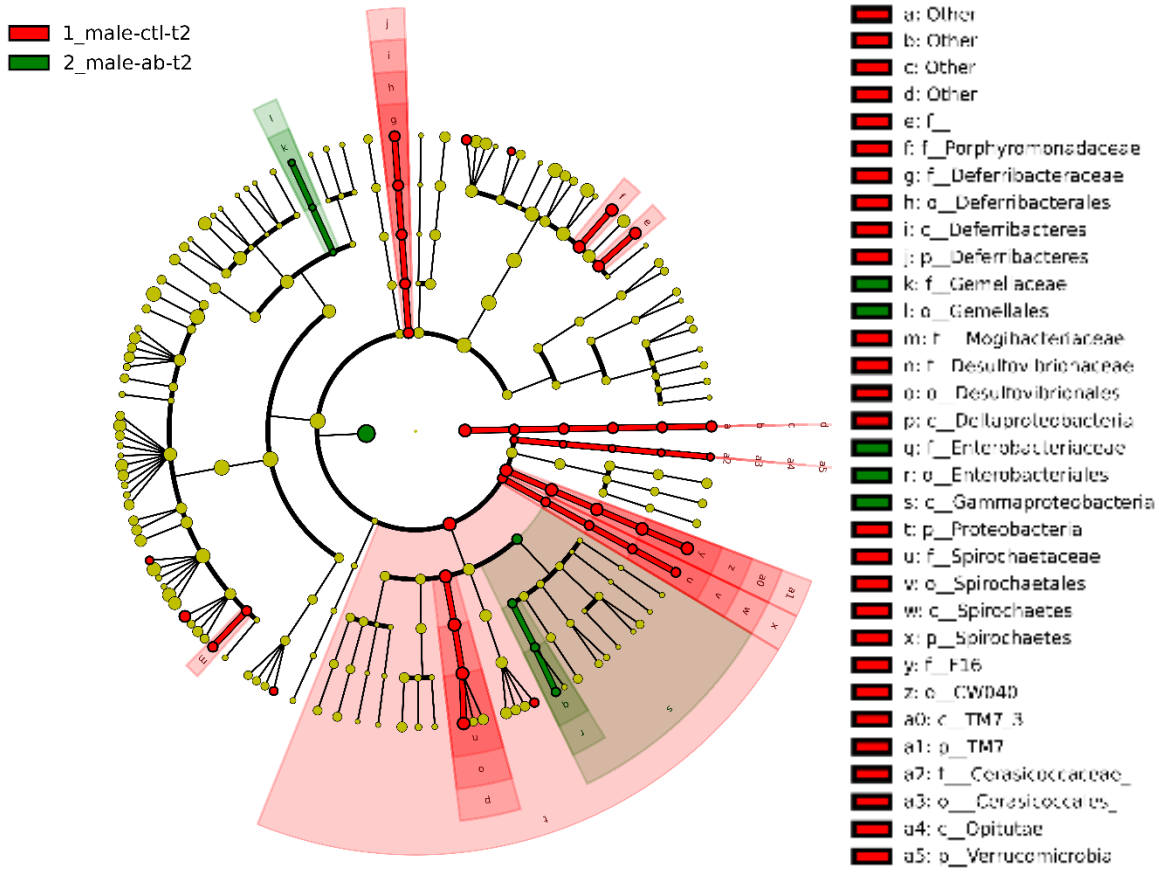



Figure S6. Cladogram generated from the microbiota of amoxicillin vs control treated dams.

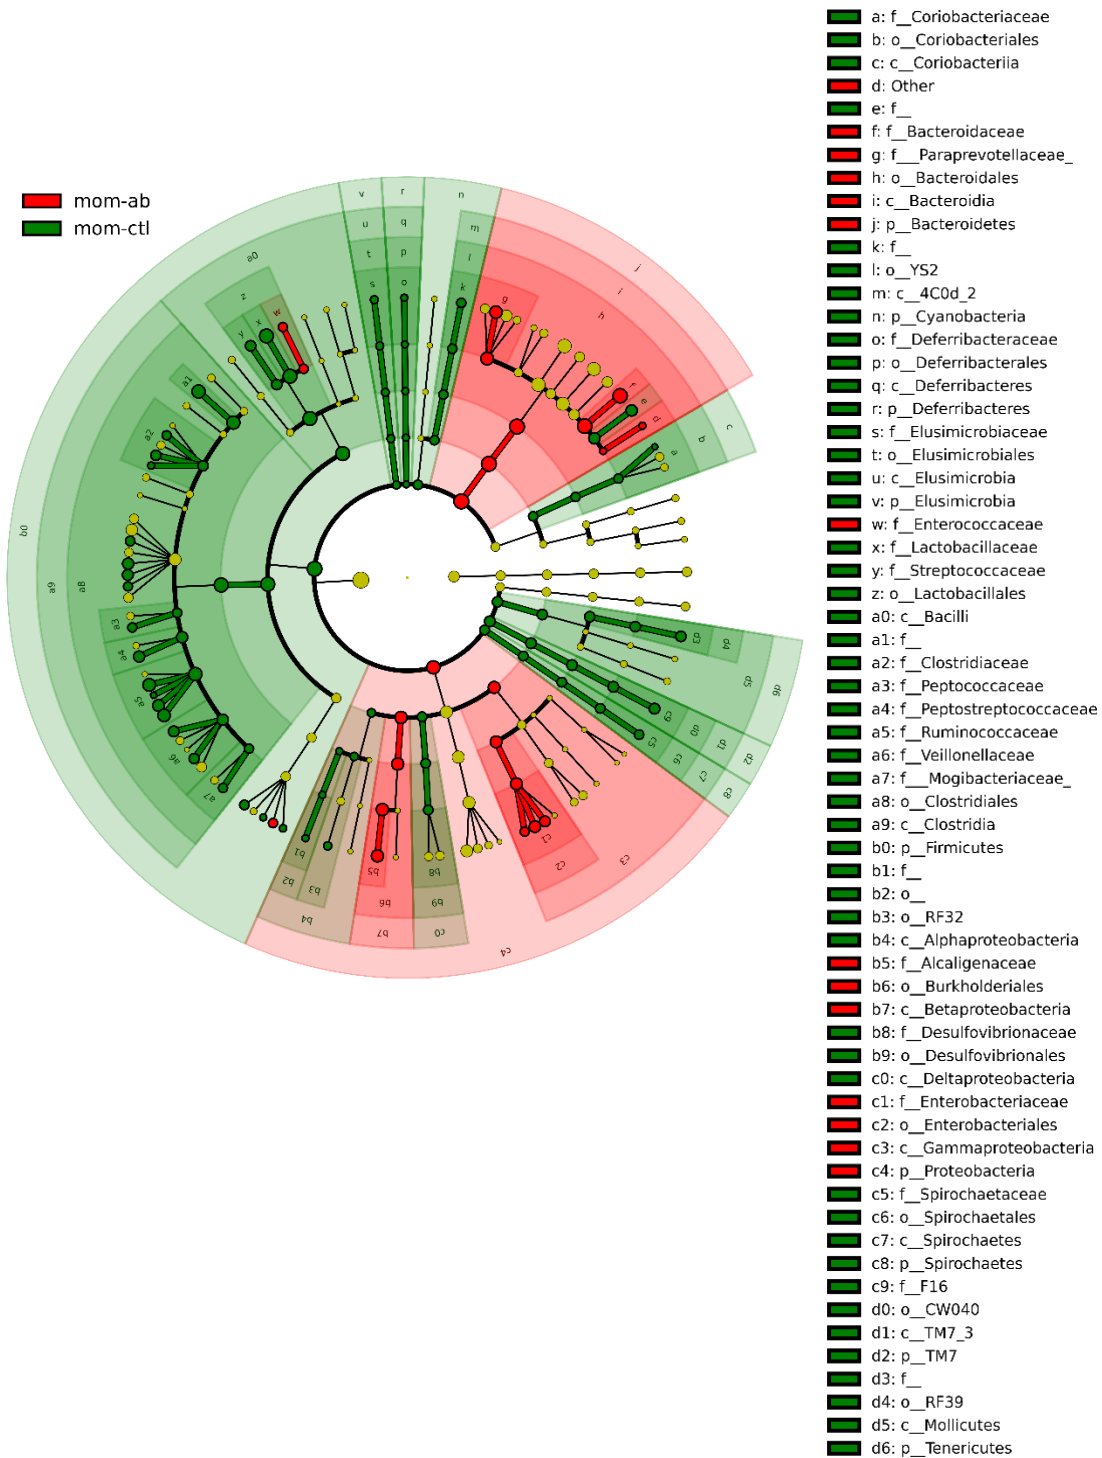

Supplement: JAH3-9-e014373-s001.pdf [file JAH3-9-e014373-s001.pdf]
